# Supplementary material
Source: publisher figshare collection journal article supplement (https://wiley.figshare.com/ndownloader/files/20151893)
Supplement: Supplementary file 1 [file 20151893]

## Sheet: LOD Calculation
		STD DEV	STD CURVE	LOD
Diphenhydramine	AUC	78480.4	512774	0.459152
blank	1564.09
blank	47758.9
blank	46108.6
blank	58661.7
blank	3476.96
blank	3874.33
blank	224371
Fluoxetine	AUC	STD DEV	STD CURVE	LOD
blank	976.572	23203.6	13823	5.03586
blank	11157.7
blank	229.838
blank	586.343
blank	44596.5
blank	27743.9
blank	56855.3
DEET	AUC	STD DEV	STD CURVE	LOD
blank	187224	61172.3	1002165.58	0.18312
blank	38557.2
blank	28011.6
blank	23364
blank	21172.9
blank	18133.6
blank	28669.7
EE2	AUC	STD DEV	STD CURVE	LOD
blank	159714	72544.3	40709	5.34607
blank	19065.3
blank	17386.9
blank	8342.4

## Sheet: EE2
Component Name		Curve Index	Weighting Index	Origin Index	Equation
EE2_2		Linear	Equal	Ignore	Y = -276895+41814.7*X R^2 = 0.9163
Filename	Sample Type	Sample Name	Sample ID	Exp Amt	Calc Amt	Units	%Diff	Level	%RSD-AMT	Peak Status	Response	Response Type	Equation	Area	Height	ISTD Area	ISTD Ht	RT	Rel RT	Del RT	S/N	Start Time	End Time	Start Height	End Height	Integ Code	Search Window	Threshold	Smooth	Acq Date	Duration	Exp Method	Proc Method	Vial	Inj Vol	Sample Wt	Sample Vol	ISTD Base Amt	ISTD Calc Amt	Dilution Factor	Study	Client	Laboratory	Company	Phone	Comment
17062112	Std Bracket Sample		0.97 ppb	0.9765	7.19205	ppm	6.36513	0.9765	0		NA	NA		23838	1240.43	NA	NA	12.1649	1.00371	-0.0449332	131.225	11.9775	12.523	355.216	398.557	BB	60	3	15	2017-06-21 19:41:15	10	C:\Xcalibur\methods\Pharm_2017 2	C:\Xcalibur\methods\ee2 dansyl chloride	E:12	NA	0	0	NA	NA	1
17062111	Std Bracket Sample		1.95 ppb	1.95	7.39131	ppm	2.79041	1.95	0		NA	NA		32169.9	2166.42	NA	NA	12.1645	1.00368	-0.0445498	205.42	11.9153	12.4296	386.034	545.86	BB	60	3	15	2017-06-21 19:17:56	10	C:\Xcalibur\methods\Pharm_2017 2	C:\Xcalibur\methods\ee2 dansyl chloride	E:11	NA	0	0	NA	NA	1
17062104	Std Bracket Sample		125 ppb	125	59.1897	ppm	-0.526482	125	0		NA	NA		2.1981e+06	191317	NA	NA	12.1648	1.00369	-0.0447663	4340.82	10.7933	12.882	15.3869	563.24	BB	60	3	15	2017-06-21 16:35:07	10	C:\Xcalibur\methods\Pharm_2017 2	C:\Xcalibur\methods\ee2 dansyl chloride	E:4	NA	0	0	NA	NA	1
17062108	Std Bracket Sample		15.6 ppb	15.625	16.1218	ppm	0.0317938	15.625	0		NA	NA		397232	32679.4	NA	NA	12.1648	1.00369	-0.0447501	729.107	10.6215	12.5541	80.0598	451.953	BB	60	3	15	2017-06-21 18:08:01	10	C:\Xcalibur\methods\Pharm_2017 2	C:\Xcalibur\methods\ee2 dansyl chloride	E:8	NA	0	0	NA	NA	1
17062103	Std Bracket Sample		250 ppb	250	231.716	ppm	-0.073136	250	0		NA	NA		9.41223e+06	838236	NA	NA	12.1814	1.00507	-0.0614003	16949.3	10.4352	13.5219	0	46.6484	BB	60	3	15	2017-06-21 16:11:55	10	C:\Xcalibur\methods\Pharm_2017 2	C:\Xcalibur\methods\ee2 dansyl chloride	E:3	NA	0	0	NA	NA	1
17062110	Std Bracket Sample		3.9 ppb	3.9	8.45449	ppm	1.16782	3.90	0		NA	NA		76626.5	5321.14	NA	NA	12.1645	1.00367	-0.0444831	333.794	11.7283	12.4765	193.44	519.706	BB	60	3	15	2017-06-21 18:54:38	10	C:\Xcalibur\methods\Pharm_2017 2	C:\Xcalibur\methods\ee2 dansyl chloride	E:10	NA	0	0	NA	NA	1
17062107	Std Bracket Sample		31.25 ppb	31.25	143.268	ppm	3.58458	31.25	0		NA	NA		5.71381e+06	502442	NA	NA	12.1646	1.00368	-0.0446004	10676.1	10.5122	12.9752	26.4154	865.681	BB	60	3	15	2017-06-21 17:44:46	10	C:\Xcalibur\methods\Pharm_2017 2	C:\Xcalibur\methods\ee2 dansyl chloride	E:7	NA	0	0	NA	NA	1
17062102	Std Bracket Sample		500 ppb	500	527.654	ppm	0.055307	500	0	Response High	NA	NA	Y = -276895+41814.7*X R^2 = 0.9163	2.17868e+07	1.95451e+06	NA	NA	12.1961	1.00628	-0.0760669	28649.8	11.8225	13.2561	21.3033	64.6952	BB	60	3	15	2017-06-21 15:48:42	10	C:\Xcalibur\methods\Pharm_2017 2	C:\Xcalibur\methods\ee2 dansyl chloride	E:2	NA	0	0	NA	NA	1
17062105	Std Bracket Sample		62.5 ppb?	62.5	7.12002	ppm	-0.88608	62.5	0		NA	NA		20826.2	712.008	NA	NA	12.1019	0.998507	0.0180999	86.4251	11.946	12.5541	391.971	424.732	BB	60	3	15	2017-06-21 16:58:20	10	C:\Xcalibur\methods\Pharm_2017 2	C:\Xcalibur\methods\ee2 dansyl chloride	E:5	NA	0	0	NA	NA	1
17062109	Std Bracket Sample		7.8 ppb	7.8125	8.80723	ppm	0.127325	7.8125	0		NA	NA		91376.1	7400.99	NA	NA	12.165	1.00371	-0.0449504	352.22	11.9312	12.4454	525.956	598.828	BB	60	3	15	2017-06-21 18:31:19	10	C:\Xcalibur\methods\Pharm_2017 2	C:\Xcalibur\methods\ee2 dansyl chloride	E:9	NA	0	0	NA	NA	1
17062101_170621152517	Unknown Sample		blank	NA	10.4415	ppm	NA	NA	NA		NA	NA		159714	5399.43	NA	NA	12.5544	1.03584	-0.4344	149.724	12.398	13.2089	3596.43	60.7933	BB	60	3	15	2017-06-21 15:25:17	10	C:\Xcalibur\methods\Pharm_2017 2	C:\Xcalibur\methods\ee2 dansyl chloride	E:1	NA	0	0	NA	NA	1
17062113	Unknown Sample		blank	NA	7.07791	ppm	NA	NA	NA		NA	NA		19065.3	579.471	NA	NA	12.1498	1.00246	-0.0298337	78.8776	11.8067	12.5393	261.503	319.627	BB	60	3	15	2017-06-21 20:04:33	10	C:\Xcalibur\methods\Pharm_2017 2	C:\Xcalibur\methods\ee2 dansyl chloride	E:1	NA	0	0	NA	NA	1
17062120	Unknown Sample		blank	NA	7.03777	ppm	NA	NA	NA		NA	NA		17386.9	534.962	NA	NA	11.884	0.980528	0.236	81.1703	11.4008	12.149	194.044	327.957	BB	60	3	15	2017-06-21 22:47:27	10	C:\Xcalibur\methods\Pharm_2017 2	C:\Xcalibur\methods\ee2 dansyl chloride	E:1	NA	0	0	NA	NA	1
17062127	Unknown Sample		blank	NA	6.82147	ppm	NA	NA	NA		NA	NA		8342.4	419.461	NA	NA	12.0868	0.997261	0.0332004	65.7006	11.978	12.3829	259.195	290.103	BB	60	3	15	2017-06-22 01:30:10	10	C:\Xcalibur\methods\Pharm_2017 2	C:\Xcalibur\methods\ee2 dansyl chloride	E:1	NA	0	0	NA	NA	1
17062116	Unknown Sample		oyster D0 ee2	NA	7.04937	ppm	NA	NA	NA		NA	NA		17872	822.785	NA	NA	12.2587	1.01145	-0.138734	92.2087	11.9627	12.4459	241.406	461.094	BB	60	3	15	2017-06-21 21:14:17	10	C:\Xcalibur\methods\Pharm_2017 2	C:\Xcalibur\methods\ee2 dansyl chloride	E:14	NA	0	0	NA	NA	1
17062117	Unknown Sample		oyster D0 mix	NA	7.01827	ppm	NA	NA	NA		NA	NA		16571.6	823.912	NA	NA	12.321	1.01659	-0.201033	92.4083	12.0093	12.4924	261.488	364.882	BB	60	3	15	2017-06-21 21:37:30	10	C:\Xcalibur\methods\Pharm_2017 2	C:\Xcalibur\methods\ee2 dansyl chloride	E:15	NA	0	0	NA	NA	1
17062124	Unknown Sample		oyster D1 ee2	NA	16.0262	ppm	NA	NA	NA		NA	NA		393233	32489.7	NA	NA	12.1483	1.00234	-0.0283498	464.488	11.8521	13.1461	0.00489568	239.108	BB	60	3	15	2017-06-22 00:20:29	10	C:\Xcalibur\methods\Pharm_2017 2	C:\Xcalibur\methods\ee2 dansyl chloride	E:20	NA	0	0	NA	NA	1
17062122	Unknown Sample		oyster D1 mix	NA	20.9868	ppm	NA	NA	NA		NA	NA		600660	47586.3	NA	NA	12.1494	1.00243	-0.0294331	875.496	10.6995	13.0846	25.7032	168.132	BB	60	3	15	2017-06-21 23:33:52	10	C:\Xcalibur\methods\Pharm_2017 2	C:\Xcalibur\methods\ee2 dansyl chloride	E:18	NA	0	0	NA	NA	1
17062125	Unknown Sample		oyster D10 ee2	NA	13.5418	ppm	NA	NA	NA		NA	NA		289350	21716.6	NA	NA	12.1491	1.0024	-0.0291165	346.583	11.5568	12.96	59.4594	245.084	BB	60	3	15	2017-06-22 00:43:43	10	C:\Xcalibur\methods\Pharm_2017 2	C:\Xcalibur\methods\ee2 dansyl chloride	E:21	NA	0	0	NA	NA	1
17062115	Unknown Sample		oyster D10 mix	NA	12.2754	ppm	NA	NA	NA		NA	NA		236398	15267.3	NA	NA	12.1492	1.00241	-0.0291671	412.576	10.1538	13.4274	27.2156	46.0171	BB	60	3	15	2017-06-21 20:50:59	10	C:\Xcalibur\methods\Pharm_2017 2	C:\Xcalibur\methods\ee2 dansyl chloride	E:13	NA	0	0	NA	NA	1
17062126	Unknown Sample		oyster D18 ee2	NA	7.12121	ppm	NA	NA	NA		NA	NA		20876	1107.09	NA	NA	12.149	1.00239	-0.0290002	95.8825	11.8217	12.383	74.9688	306.572	BB	60	3	15	2017-06-22 01:06:58	10	C:\Xcalibur\methods\Pharm_2017 2	C:\Xcalibur\methods\ee2 dansyl chloride	E:22	NA	0	0	NA	NA	1
17062123	Unknown Sample		oyster D18 mix	NA	7.07365	ppm	NA	NA	NA		NA	NA		18887	746.237	NA	NA	12.2738	1.01269	-0.153767	85.5505	11.8684	12.3984	226.198	459.097	BB	60	3	15	2017-06-21 23:57:11	10	C:\Xcalibur\methods\Pharm_2017 2	C:\Xcalibur\methods\ee2 dansyl chloride	E:19	NA	0	0	NA	NA	1
17062118	Unknown Sample		oyster D5 ee2	NA	17.175	ppm	NA	NA	NA		NA	NA		441272	33133.6	NA	NA	12.149	1.0024	-0.0290498	528.856	10.7149	12.9595	14.8493	414.059	BB	60	3	15	2017-06-21 22:00:50	10	C:\Xcalibur\methods\Pharm_2017 2	C:\Xcalibur\methods\ee2 dansyl chloride	E:16	NA	0	0	NA	NA	1
17062119	Unknown Sample		oyster D5 mix	NA	15.4707	ppm	NA	NA	NA		NA	NA		370008	28246	NA	NA	12.1499	1.00247	-0.0298833	442.75	11.7284	13.1319	0	254.527	BB	60	3	15	2017-06-21 22:24:09	10	C:\Xcalibur\methods\Pharm_2017 2	C:\Xcalibur\methods\ee2 dansyl chloride	E:17	NA	0	0	NA	NA	1
17062106	Std Bracket Sample		QAQC	NA	44.5999	ppm	NA	NA	NA		NA	NA		1.58803e+06	136212	NA	NA	12.1644	1.00366	-0.0444163	3166.18	10.9798	14.0816	-0.481309	50.6326	BB	60	3	15	2017-06-21 17:21:34	10	C:\Xcalibur\methods\Pharm_2017 2	C:\Xcalibur\methods\ee2 dansyl chloride	E:6	NA	0	0	NA	NA	1
17062114	Unknown Sample		QAQC	NA	24.6896	ppm	NA	NA	NA		NA	NA		755490	63287.7	NA	NA	12.1643	1.00366	-0.0443333	1520.93	10.9013	14.0195	30.8896	39.4839	BB	60	3	15	2017-06-21 20:27:47	10	C:\Xcalibur\methods\Pharm_2017 2	C:\Xcalibur\methods\ee2 dansyl chloride	E:6	NA	0	0	NA	NA	1
17062121	Unknown Sample		QAQC	NA	6.98756	ppm	NA	NA	NA		NA	NA		15287.4	775.293	NA	NA	12.1185	0.999872	0.00154984	89.724	11.7756	12.2586	293.214	449.503	BB	60	3	15	2017-06-21 23:10:40	10	C:\Xcalibur\methods\Pharm_2017 2	C:\Xcalibur\methods\ee2 dansyl chloride	E:6	NA	0	0	NA	NA	1
17062128	Unknown Sample		QAQC	NA	6.94875	ppm	NA	NA	NA		NA	NA		13664.6	507.633	NA	NA	11.8217	0.975391	0.298267	75.4632	11.5254	12.0867	274.369	336.871	BB	60	3	15	2017-06-22 01:53:23	10	C:\Xcalibur\methods\Pharm_2017 2	C:\Xcalibur\methods\ee2 dansyl chloride	E:6	NA	0	0	NA	NA	1
Created By:
User Name		Full Name		Date
Quantum				6/22/2017 4:30:23 PM
		tissue weight (g)	ng/g	ng/g - blank corrected
oyster D0 ee2	7.04937	1.6892	4.1732	0	oyster D0 ee2
oyster D1 ee2	16.0262	0.9745	16.4455	9.40774	oyster D1 ee2
oyster D5 ee2	17.175	1.6137	10.6432	3.60547	oyster D5 ee2
oyster D10 ee2	13.5418	1.7811	7.60304	0.565275	oyster D10 ee2
oyster D18 ee2	7.12121	1.389	5.12686	0	oyster D18 ee2
oyster D0 mix	7.01827	2.4396	2.87681	0	oyster D0 mix
oyster D1 mix	20.9868	1.4136	14.8463	7.80856	oyster D1 mix
oyster D5 mix	15.4707	1.2737	12.1463	5.10852	oyster D5 mix
oyster D10 mix	12.2754	1.607	7.63872	0.600953	oyster D10 mix
oyster D18 mix	7.07365	1.264	5.59624	0	oyster D18 mix

## Sheet: Diphenhydramine
Component Name		Curve Index	Weighting Index	Origin Index		Equation
diphen		Linear	Equal	Force		Y = 512574*X R^2 = 0.9464
						EXCLUDED 500 PPB
Sample ID	Exp Amt	Calc Amt	Units	Equation		Area	Height	RT
8.06	8.06	6.59123	ppm			3.37849e+06	171336	16.5009
15.625	15.625	14.6283	ppm			7.49809e+06	371561	16.5
31.25	31.25	23.9133	ppm			1.22573e+07	612055	16.4681
62.5	62.5	11.9942	ppm			6.1479e+06	349754	16.4012
125	125	142.787	ppm	Y = 512574*X R^2 = 0.9464		7.31889e+07	3.55995e+06	16.5327
250	250	254.89	ppm			1.3065e+08	6.32933e+06	16.4347
500	500	307.903	ppm			1.57823e+08	7.37145e+06	16.3363
16.125	16.125	14.1058	ppm			7.23026e+06	360156	16.4675
31.25	NA	28.6683	ppm			1.46946e+07	688372	17.1899
250	NA	176.276	ppm			9.03544e+07	4.0076e+06	17.2556
blank	NA	0.00305144	ppm			1564.09	168.201	16.7302
blank	NA	0.0931746	ppm			47758.9	2617.81	16.4346
blank	NA	0.089955	ppm			46108.6	1572.07	16.7962
blank	NA	0.114445	ppm			58661.7	1671.7	17.2224
blank	NA	0.00678333	ppm			3476.96	151.155	15.351
blank	NA	0.00755858	ppm			3874.33	136.16	16.2705
blank	NA	0.437733	ppm			224371	6108.87	17.1243
	average:	0.107529
Sample ID	Exp Amt	Calc Amt	Units	Equation		Area	Height	RT
d0 con	NA	0.0368646	ppm			18895.9	914.916	17.1565				d0 con	NA	0.0368646	ppm
d0 deet	NA	0.00534293	ppm			2738.65	188.742	16.4353				d1 con	NA	0.0075941	ppm
d0 ee2	NA	0.00431606	ppm			2212.3	137.512	16.8948				d5 con	NA	0.00834548	ppm
d0 fluox	NA	0.0031136	ppm			1595.95	138.348	16.0399				d10 con	NA	0.00802852	ppm
d1 con	NA	0.0075941	ppm			3892.54	301.631	16.9593
d1 deet	NA	0.108557	ppm			55643.3	2535.9	16.96
d1 ee2	NA	0.00418729	ppm			2146.3	131.516	16.6316
d1 fluox	NA	0.0307267	ppm			15749.7	512.242	17.3869
d10 con	NA	0.00802852	ppm			4115.21	261.373	16.5003
d10 deet	NA	0.026169	ppm			13413.5	539.121	16.9605
d10 ee2	NA	0.0298853	ppm			15318.4	483.966	16.862
d10 fluox	NA	0.0140193	ppm			7185.95	310.479	16.533
d18 deet	NA	0.0080754	ppm			4139.24	227.81	16.4349
d18 ee2	NA	0.0115191	ppm			5904.37	284.632	17.3548
d5 con	NA	0.00834548	ppm			4277.68	240.301	16.2047
d5 deet	NA	0.11405	ppm			58459.3	2767.05	17.2558
d5 ee2	NA	0.0287248	ppm			14723.6	705.287	17.3207
d5 fluox	NA	0.0795927	ppm			40797.2	1830.45	17.3205
qaqc 62.5	NA	50.1926	ppm			2.57274e+07	1.21379e+06	16.8612
qaqc 62.5	NA	50.7673	ppm			2.6022e+07	1.18063e+06	17.1904
qaqc 62.5	NA	50.2299	ppm			2.57465e+07	1.17031e+06	17.2557
				Dry tissue weight
		ng		g	ng/g
d0 mix	NA	0.0258031	ppm	2.4396	=C54/E54	13226	564.08	16.731
d0 diphen	NA	0.0146662	ppm	1.917	0.00765062	7517.53	386.674	17.1243
d1 mix	NA	3.04147	ppm	1.4136	2.15157	1.55898e+06	71974.5	17.3868
d1 diphen	NA	3.79973	ppm	1.7	2.23513	1.94764e+06	89639.2	17.3544
d5 mix	NA	2.96332	ppm	1.2737	2.32655	1.51892e+06	65796.2	17.4204
d5 diphen	NA	7.0128	ppm	1.0751	6.52293	3.59458e+06	165229	17.2886
d10 mix	NA	5.28313	ppm	1.607	3.28757	2.70799e+06	124852	17.1239
d10 diphen	NA	2.15246	ppm	1.013	2.12484	1.1033e+06	49684.9	17.3539
d18 mix	NA	0.149499	ppm	1.264	0.118274	76629	3139.48	22.51
d18 diphen	NA	0.135718	ppm	1.426	0.095174	69565.5	3040.43	17.0266
				For the blank, subtract 0.108 ng from each sample		blank			blank
						corrected			corrected
					ng/g	ng/g		ng/g	ng/g
				d0 mix	0.0105768	0	d0 diphen	0.00765062	0
				d1 mix	2.15157	2.04357	d1 diphen	2.23513	2.12713
				d5 mix	2.32655	2.21855	d5 diphen	6.52293	6.41493
				d10 mix	3.28757	3.17957	d10 diphen	2.12484	2.01684
				d18 mix	0.118274	0.0102742	d18 diphen	0.095174	0

## Sheet: Fluoxetine
Component Name		Curve Index	Weighting Index	Origin Index	Equation
fluox2		Linear	Equal	Force	Y = 13831.3*X R^2 = 0.9272
					EXCLUDED 500 PPB
Sample ID	Exp Amt	Calc Amt	Units	Area	Height	RT	Equation
8.06	8.06	7.13821	ppm	98730.4	4816.49	21.5026	Y = 13831.3*X R^2 = 0.9272
15.625	15.625	10.3515	ppm	143174	6997.36	21.4693
31.25	31.25	30.2376	ppm	418225	20529.6	21.4374
62.5	62.5	0.431573	ppm	5969.2	329.808	21.3706
125	125	120.886	ppm	1.672e+06	80569	21.5347
250	250	267.854	ppm	3.70475e+06	179198	21.4701
500	500	1777.27	ppm	2.45819e+07	1.17923e+06	21.3379
16.125	16.125	19.3278	ppm	267328	12971.3	21.4369
31.25	NA	24.1366	ppm	333839	14680.7	22.6514
250	NA	610.058	ppm	8.43788e+06	350280	22.7171
blank	NA	0.0706062	ppm	976.572	72.7879	21.3052
blank	NA	0.806702	ppm	11157.7	637.223	21.4035
blank	NA	0.0166173	ppm	229.838	19.0644	21.404
blank	NA	0.0423926	ppm	586.343	44.1059	21.5351
blank	NA	3.22433	ppm	44596.5	693.126	22.7828
blank	NA	2.00588	ppm	27743.9	796.84	22.7502
blank	NA	4.11064	ppm	56855.3	1452.83	22.5531
	average	1.46817
Sample ID	Exp Amt	Calc Amt	Units	Area	Height	RT
d0 con	NA	0.0700594	ppm	969.01	83.0158	21.7319			d0 con	NA	0.0700594	ppm
d0 deet	NA	0.0337034	ppm	466.161	37.7965	21.109			d1 con	NA	NF
d0 diphen	NA	0.051488	ppm	712.143	31.3553	21.3057			d5 con	NA	0.150286
d0 ee2	NA	0.0486025	ppm	672.234	32.7455	21.273			d10 con	NA	0.0952314
d1 con	NA	NF	ppm	NF	NF	NF
d1 deet	NA	0.0722608	ppm	999.458	44.8739	21.2726
d1 diphen	NA	0.0132267	ppm	182.942	19.3512	21.2399
d1 ee2	NA	0.295871	ppm	4092.27	196.053	22.4547
d10 con	NA	0.0952314	ppm	1317.17	76.6207	20.9768
d10 deet	NA	0.0508289	ppm	703.027	57.5103	21.437
d10 diphen	NA	0.934668	ppm	12927.6	323.373	22.6515
d10 ee2	NA	0.044134	ppm	610.429	39.1365	21.5027
d18 deet	NA	0.272362	ppm	3767.11	161.786	21.2729
d18 diphen	NA	0.0884984	ppm	1224.04	59.3445	21.306
d18 ee2	NA	0.110028	ppm	1521.82	110.76	21.7002
d5 con	NA	0.150286	ppm	2078.65	68.6937	21.0423
d5 deet	NA	1.77926	ppm	24609.4	812.662	22.6846
d5 diphen	NA	0.0241736	ppm	334.351	30.1082	21.4035
d5 ee2	NA	0.136361	ppm	1886.04	93.7845	21.3379
qaqc 62.5	NA	111.785	ppm	1.54613e+06	71794.6	22.0601
qaqc 62.5	NA	106.132	ppm	1.46794e+06	63323.4	22.6523
qaqc 62.5	NA	93.2801	ppm	1.29018e+06	55255.7	22.7172
				Dry tissue weight
				g	ng/g
d0 mix	NA	0.140391	ppm	2.4396	0.0575469	1941.79	72.8385	21.5359
d0 fluox	NA	0.0504343	ppm	1.6033	0.0314565	697.569	52.8639	21.0094
d1 fluox	NA	76.1649	ppm	1.6003	47.5942	1.05346e+06	38092.3	22.8817
d1 mix	NA	5.98625	ppm	1.4136	4.23475	82797.4	3442.11	22.8815
d5 mix	NA	47.5246	ppm	1.2737	37.3123	657326	23957.2	22.9475
d5 fluox	NA	179.721	ppm	1.2392	145.03	2.48577e+06	96482.6	22.7492
d10 mix	NA	126.604	ppm	1.607	78.7829	1.75109e+06	68630	22.6182
d10 fluox	NA	53.571	ppm	1.2546	42.6997	740954	28512.4	22.52
d18 mix	NA	17.9369	ppm	1.264	14.1906	248090	8463.59	22.9803
d18 fluox				1.19	0
		subtract 1.468 ng from each sample
		blank			blank
	ng/g	corrected			corrected
d0 mix	0.0575469	0	d0 fluox	0.0314565	0
d1 mix	4.23475	2.76675	d1 fluox	47.5942	46.1262
d5 mix	37.3123	35.8443	d5 fluox	145.03	143.562
d10 mix	78.7829	77.3149	d10 fluox	42.6997	41.2317
d18 mix	14.1906	12.7226	d18 fluox		-1.468

## Sheet: DEET
Component Name		Curve Index	Weighting Index	Origin Index	Equation
deet		Linear	Equal	Force	Y = 1.00039e+006*X R^2 = 0.9341
					EXCLUDED 500 PPB
Sample ID	Exp Amt	Calc Amt	Units	Area	Height	RT	Equation
8.06	8.06	3.10648	ppm	3.1077e+06	131923	21.9734	Y = 1.00039e+006*X R^2 = 0.9341
15.625	15.625	18.0501	ppm	1.80572e+07	750294	21.9399
31.25	31.25	13.8894	ppm	1.38949e+07	598087	21.875
62.5	62.5	8.09708	ppm	8.10026e+06	380685	21.8414
125	125	145.688	ppm	1.45745e+08	5.69759e+06	22.038
250	250	256.026	ppm	2.56126e+08	1.02034e+07	21.9406
500	500	230.852	ppm	2.30943e+08	9.2049e+06	21.8415
16.125	16.125	6.96577	ppm	6.9685e+06	301058	21.9072
31.25	NA	40.0393	ppm	4.00551e+07	1.6622e+06	21.5136
250	NA	105.149	ppm	1.0519e+08	4.21487e+06	21.5131
blank	NA	0.18715	ppm	187224	5903.88	22.006
blank	NA	0.0385421	ppm	38557.2	1541.74	21.8744
blank	NA	0.0280006	ppm	28011.6	1225.81	21.8093
blank	NA	0.0233549	ppm	23364	1085.92	21.5789
blank	NA	0.0211646	ppm	21172.9	917.626	21.5136
blank	NA	0.0181265	ppm	18133.6	823.11	21.5135
blank	NA	0.0286585	ppm	28669.7	1134.06	21.6776
	average	0.0492854
Sample ID	Exp Amt	Calc Amt	Units	Area	Height	RT
d0 diphen	NA	0.47671	ppm	476897	21445.8	21.7434
d0 ee2	NA	1.0725	ppm	1.07292e+06	45769.6	21.8095
d0 fluox	NA	0.43288	ppm	433049	19253.9	21.7098			d0 con	NA	1.97572	ppm	1.9765e+06	83565.7	21.6773
d1 diphen	NA	0.408172	ppm	408332	18451.4	21.6452			d1 con	NA	1.27296	ppm	1.27346e+06	55564.2	21.8403
d1 ee2	NA	0.631262	ppm	631509	27628.4	21.6775			d5 con	NA	3.55051	ppm	3.5519e+06	151943	21.6444
d1 fluox	NA	0.519661	ppm	519865	22963.7	21.5789			d10 con	NA	1.82774	ppm	1.82846e+06	79139.6	21.6444
d10 diphen	NA	1.11807	ppm	1.11851e+06	48551.1	21.5459
d10 ee2	NA	2.30606	ppm	2.30696e+06	99533.5	21.8091
d10 fluox	NA	0.490531	ppm	490723	21509	21.7427
d18 diphen	NA	0.641042	ppm	641294	28734.5	21.7441
d18 ee2	NA	0.53647	ppm	536680	23526.6	21.6124
d5 diphen	NA	1.0696	ppm	1.07002e+06	47187.3	21.6445
d5 ee2	NA	1.07196	ppm	1.07238e+06	46711.3	21.6117
d5 fluox	NA	0.547142	ppm	547357	24072.3	21.6768
qaqc 62.5	NA	25.1019	ppm	2.51117e+07	1.06981e+06	21.7755
qaqc 62.5	NA	1.83225	ppm	1.83297e+06	411997	21.4812
qaqc 62.5	NA	25.2925	ppm	2.53024e+07	1.0714e+06	21.5461
				tissue weight (g)	ng/g
d0 mix	NA	5.80782	ppm	2.4396	2.38065	5.8101e+06	237299	21.8424
d0 deet	NA	1.438	ppm	1.5492	0.92822	1.43856e+06	61575.1	21.7439
d1 mix	NA	0.5023	ppm	1.4136	0.355334	502497	21468.7	21.546
d1 deet	NA	3.05106	ppm	1.3705	2.22624	3.05226e+06	134748	21.7763
d5 mix	NA	1.2356	ppm	1.2737	0.970085	1.23608e+06	54200.7	21.5796
d5 deet	NA	2.1517	ppm	0.9838	2.18713	2.15254e+06	93908.7	21.5135
d10 mix	NA	2.90596	ppm	1.607	1.80831	2.9071e+06	120719	21.7097
d10 deet	NA	1.52218	ppm	1.3915	1.09391	1.52278e+06	67289.7	21.8096
d18 mix	NA	0.733947	ppm	1.264	0.580654	734235	32385.8	21.6452
d18 deet	NA	0.682834	ppm	1.943	0.351433	683102	29899.3	21.5135
		subtract 0.049 ng from each sample
		blank			blank
	ng/g	corrected			corrected
d0 mix	2.38065	2.33165	d0 deet	0.92822	0.87922
d1 mix	0.355334	0.306334	d1 deet	2.22624	2.17724
d5 mix	0.970085	0.921085	d5 deet	2.18713	2.13813
d10 mix	1.80831	1.75931	d10 deet	1.09391	1.04491
d18 mix	0.580654	0.531654	d18 deet	0.351433	0.302433

## Sheet: Component
Component Name		Curve Index	Weighting Index	Origin Index	Equation
Filename	Sample Type	Sample Name	Sample ID	Exp Amt	Calc Amt	Units	%Diff	Level	%RSD-AMT	Peak Status	Response	Response Type	Equation	Area	Height	ISTD Area	ISTD Ht	RT	Rel RT	Del RT	S/N	Start Time	End Time	Start Height	End Height	Integ Code	Search Window	Threshold	Smooth	Acq Date	Duration	Exp Method	Proc Method	Vial	Inj Vol	Sample Wt	Sample Vol	ISTD Base Amt	ISTD Calc Amt	Dilution Factor	User Test 1	User Text 2	User Text3	User Text4	User Text5	Comment
